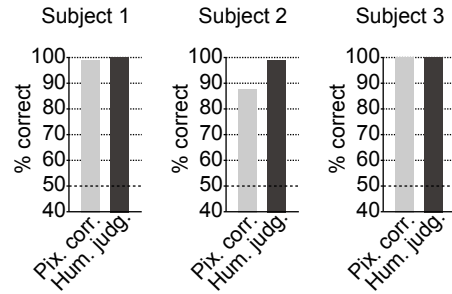

**S13 Fig. Reconstruction quality of alphabetical letters for individual subjects.**

Evaluations on individual subjects' results are separately shown (VC activity; DNN1–8; without the DGN;  $N = 10$ ; chance level, 50%; cf., Fig 6C right). Evaluations of reconstructions using pixel-wise spatial correlation showed 98.9%, 87.8%, and 100.0% for Subject 1–3, respectively. Evaluations of reconstructions using human judgment showed 100.0%, 98.9%, and 100.0% for Subject 1–3, respectively.
