# Supplementary material for: Deep image reconstruction from human brain activity
Source: PLOS journal article supplement (doi:10.1371/journal.pcbi.1006633), 2019-01-14
Supplement: S12 (10.1371/journal.pcbi.1006633.s012) [file journal.pcbi.1006633.s012]

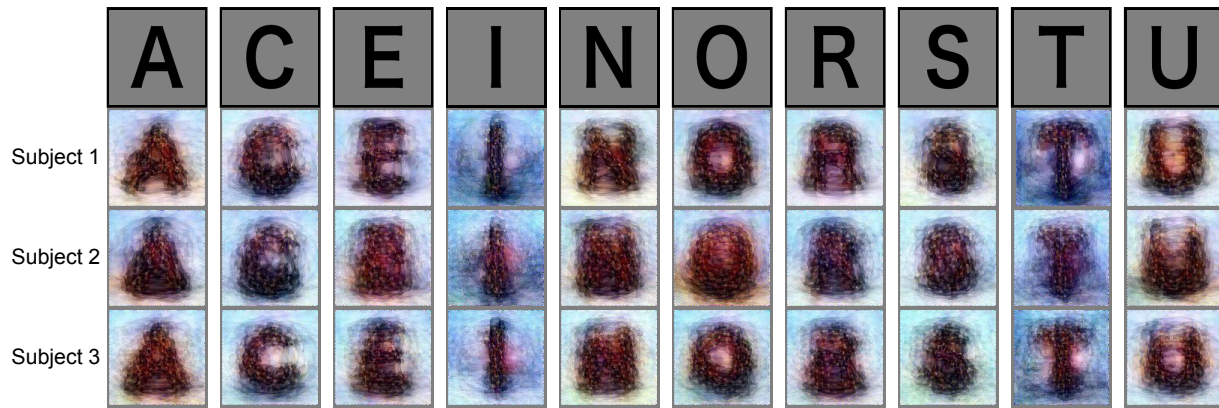

**S11 Fig. All examples of alphabetical letter reconstructions.** The black and gray surrounding frames indicate presented and reconstructed images respectively (VC activity, DNN 1–8, without the DGN). The three rows of reconstructed images correspond to reconstructions from three subjects.
