# Supplementary material for: Deep image reconstruction from human brain activity
Source: PLOS journal article supplement (doi:10.1371/journal.pcbi.1006633), 2019-01-14
Supplement: S13 (10.1371/journal.pcbi.1006633.s013) [file journal.pcbi.1006633.s013]

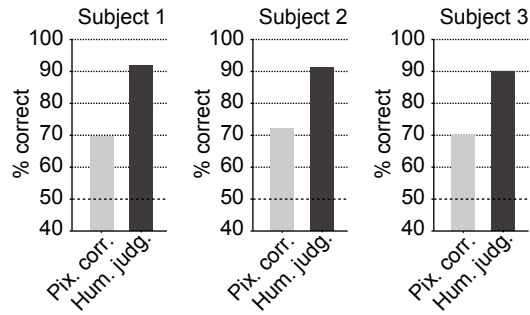

**S12 Fig. Reconstruction quality of artificial shapes for individual subjects.**

Evaluations on individual subjects' results are separately shown (VC activity; DNN1–8; without the DGN;  $N = 40$ ; chance level, 50%; cf., Fig 6C left). Evaluations of reconstructions using pixel-wise spatial correlation showed 69.6%, 72.1%, and 69.8% for Subject 1–3, respectively. Evaluations of reconstructions using human judgment showed 91.7%, 91.3%, and 90.1% for Subject 1–3, respectively.
